# Supplementary material
Source: Springer Nature journal article supplement (https://www.springermedizin.de/resource/supplementary/12939_2013_460_MOESM3_ESM.pdf/9551214)

### student

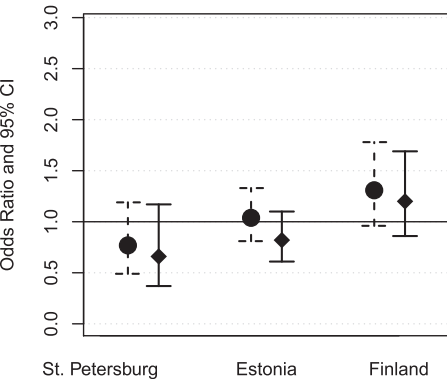

### unemployed

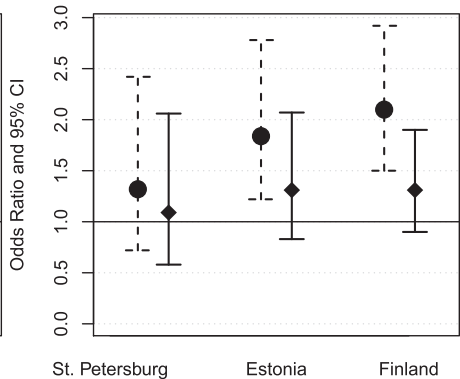

### housewives

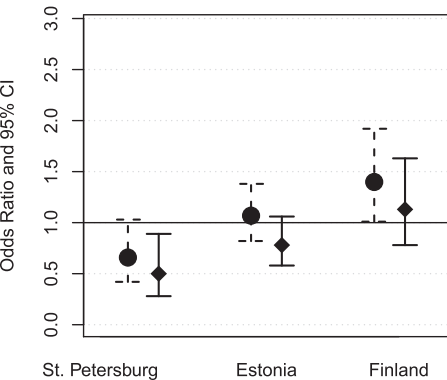

Supplement: MOESM3 [file 9551214]
